# Supplementary material for: Environmental drivers of monomethylmercury photodegradation along the land-to-ocean aquatic continuum
Source: Royal Society of Chemistry journal article supplement (doi:10.1039/d4em00636d), 2025-01-01
Supplement: d4em00636d1.xlsx [file d4em00636d1.xlsx]

## Sheet: Read me
Excel Sheet Name	Experiment ID	Description	Section	Figure
Data Hg	1	SRHA gradient	3.1 Role of DOM concentration	1; S3
Data Hg	2	NaCl gradient	3.2 Role of Salinity	2; S4
Data Hg	3	SRHA & NaCl	3.2 Role of Salinity	S5
Data Hg	4	SRHA vs. LHA	3.3 Role of DOM source	S11
Data Hg	5	SRHA vs. BS-DOM	3.3 Role of DOM source	S12
Data Hg	6	Arctic Ocean (N2-purged)	3.2 Role of Salinity	S6
Data Hg	7	NaCl solution (N2-purged)	3.2 Role of Salinity	S7
Data Hg	8	Pond Laduviken (N2-purged)	3.2 Role of Salinity	S8
Data Hg	9	Brackish water Värtan (N2-purged)	3.2 Role of Salinity	S9
Absorbance		Absorbance measurments of the waters used in this study	3.1 Role of DOM concentration; 3.3 Role of DOM source	3

## Sheet: Data Hg
Experiment ID	Timepoint (minutes)	MM200Hg (ng L-1)	200HgII (ng L-1)	DM200Hg (ng L-1)	DOC (mg/L)	salinity	DOM type	N2-purged
1	0	2.67399	0.0252994	0.0114183	0		SRHA
1	0	2.73378	0.0255431	-0.00817687	0.0268161		SRHA
1	0	2.42074	0.0309165	0.0154522	0.26557		SRHA
1	0	2.53211	0.027545	0.00534539	2.64448		SRHA
1	0	2.59015	-0.0124991	-0.00808878	26.5656		SRHA
1	30	2.33781	0.360472	0.00792525	0		SRHA
1	30	2.23285	0.327592	0.00391864	0.0268161		SRHA
1	30	2.1191	0.178186	0.00527062	0.26557		SRHA
1	30	1.79769	0.128329	0.00635657	2.64448		SRHA
1	30	2.19801	0.0765404	0.00646269	26.5656		SRHA
1	60	1.88506	0.619266	0.00824478	0		SRHA
1	60	2.03447	0.583405	0.0159176	0.0268161		SRHA
1	60	1.73496	0.274502	0.00867444	0.26557		SRHA
1	60	1.67536	0.255645	0.00633262	2.64448		SRHA
1	60	1.33635	0.0466807	-0.00992906	26.5656		SRHA
1	90	1.68025	0.799646	0.0174419	0		SRHA
1	90	1.61948	0.772745	0.00331809	0.0268161		SRHA
1	90	1.53162	0.384608	0.00516066	0.26557		SRHA
1	90	1.25241	0.287672	-0.00441634	2.64448		SRHA
1	90	1.7931	0.090006	-0.000499595	26.5656		SRHA
1	150	1.3959	1.12898	0.00155507	0		SRHA
1	150	1.21706	1.12163	0.00114688	0.0268161		SRHA
1	150	0.98714	0.55329	0.00353775	0.26557		SRHA
1	150	0.981405	0.550562	0.0204938	2.64448		SRHA
1	150	1.3218	0.160734	0.0238225	26.5656		SRHA
1	210	1.08487	1.26902	0.0229611	0		SRHA
1	210	0.93265	1.30952	-0.00875451	0.0268161		SRHA
1	210	0.706874	0.706715	0.0132495	0.26557		SRHA
1	210	0.711107	0.739393	0.0135116	2.64448		SRHA
1	210	1.22696	0.213889	-0.00167357	26.5656		SRHA
2	0	2.99057	0.0382994	-0.00467983	0
2	0	3.09756	0.0380875	-0.00398893	2
2	0	3.09756	0.0380875	-0.00398893	20
2	0	3.09756	0.0380875	-0.00398893	10
2	0	3.20456	0.0378756	-0.00329803	35
2	30	1.60406	0.78539	-0.013183	0
2	30	1.5977	0.819817	0.0765642	2
2	30	2.61633	0.187346	-0.0027783	20
2	30	2.29773	0.376048	0.0102058	10
2	30	2.81047	0.156501	-0.00117873	35
2	60	1.18041	1.00796	-0.000446158	0
2	60	1.1831	1.03555	-0.00237421	2
2	60	2.41659	0.251829	-0.00855259	20
2	60	1.76856	0.661651	0.000387467	10
2	60	2.61944	0.186367	-0.0120085	35
2	90	0.996246	1.14865	-0.00300759	0
2	90	0.925634	1.17663	-0.0015673	2
2	90	2.12911	0.394573	0.0183252	20
2	90	1.46691	0.650549	-0.0106446	10
2	90	2.63464	0.22761	-0.00169755	35
2	150	0.725012	1.39148	0.0119495	0
2	150	0.5718	1.4221	0.0103853	2
2	150	1.90524	0.524486	0.00919973	20
2	150	0.992187	1.09201	-0.00680247	10
2	150	2.32394	0.357544	-0.0116416	35
2	210	0.52615	1.53444	-0.00852402	0
2	210	0.329226	1.36255	-0.00110645	2
2	210	1.69857	0.802371	0.0195862	20
2	210	0.594659	1.47463	0.0102455	10
2	210	2.4215	0.407858	-0.00562047	35
3	0	2.36772	0.0253463	0.000442435	0.26557	35	SRHA
3	0	2.26915	-0.00980965	0.00302469	26.5656	35	SRHA
3	0	2.24408	0.0308887	0.000538213	2.64448	20	SRHA
3	0	1.60771	-0.0105466	0.00202213	26.5656	2	SRHA
3	0	2.45506	0.0338394	-0.0026794	0.26557	2	SRHA
3	30	1.97972	0.236968	0.00303481	0.26557	35	SRHA
3	30	2.00909	-0.017941	0.00405354	26.5656	35	SRHA
3	30	2.2126	0.138462	-0.000377764	2.64448	20	SRHA
3	30	1.59969	0.00363945	-0.0123394	26.5656	2	SRHA
3	30	1.90226	0.151688	-0.0111143	0.26557	2	SRHA
3	60	2.70633	0.666815	0.0103559	0.26557	35	SRHA
3	60	3.40498	0.0553373	-0.00239578	26.5656	35	SRHA
3	60	2.59295	0.315328	-0.0036497	2.64448	20	SRHA
3	60	2.93217	0.0319894	-0.00459496	26.5656	2	SRHA
3	60	2.71591	0.40032	-0.00926475	0.26557	2	SRHA
3	90	1.46824	0.523951	-0.0126327	0.26557	35	SRHA
3	90	2.19762	0.0362883	-0.0117416	26.5656	35	SRHA
3	90	1.40399	0.336693	0.00400881	2.64448	20	SRHA
3	90	1.60908	0.0541885	-0.00329685	26.5656	2	SRHA
3	90	1.48341	0.339119	-0.00555947	0.26557	2	SRHA
3	150	1.15598	0.720373	-0.00698711	0.26557	35	SRHA
3	150	1.90626	0.120005	-0.00288352	26.5656	35	SRHA
3	150	1.02686	0.4805	-0.00464657	2.64448	20	SRHA
3	150	1.42475	0.154787	0.00245455	26.5656	2	SRHA
3	150	0.963121	0.364472	-0.00212144	0.26557	2	SRHA
3	270	0.800522	0.951384	0.0117679	0.26557	35	SRHA
3	270	1.85817	0.25041	-0.00795799	26.5656	35	SRHA
3	270	0.561059	0.721489	0.00200933	2.64448	20	SRHA
3	270	0	0.67334	0.0641117	26.5656	2	SRHA
3	270	0.435401	0.592048	-0.000823745	0.26557	2	SRHA
4	0	2.1517	0.0292905	0.00404067	2.64448		SRHA
4	0	1.84749	0.0237769	0.0020777	2.64448		LHA
4	0	2.13778	0.0186401	-0.00721143	2.64448		SRHA & LHA
4	0	1.87407	0.0223835	0.00770599	2.64448		SRHA
4	0	2.31925	0.0200201	0.00193523	2.64448		LHA
4	30	1.9143	0.114477	0.0108083	2.64448		SRHA
4	30	1.52416	0.120275	-0.00959398	2.64448		LHA
4	30	1.94994	0.105099	0.0049056	2.64448		SRHA & LHA
4	30	1.50408	0.105076	0.000441552	2.64448		SRHA
4	30	2.07563	0.093694	-0.00573949	2.64448		LHA
4	90	1.26045	0.332864	0.00309583	2.64448		SRHA
4	90	1.05875	0.314067	0.00798023	2.64448		LHA
4	90	1.25044	0.238121	0.0107447	2.64448		SRHA & LHA
4	90	1.21441	0.353975	0.00781362	2.64448		SRHA
4	90	1.48323	0.145593	0.0163044	2.64448		LHA
4	150	0.755564	0.437113	0.0118348	2.64448		SRHA
4	150	0.776425	0.445303	0.00266979	2.64448		LHA
4	150	0.926946	0.366464	0.00544406	2.64448		SRHA & LHA
4	150	0.820755	0.476387	0.00771636	2.64448		SRHA
4	150	0.926738	0.438929	0.0161274	2.64448		LHA
4	210	0.503872		0.0251796	2.64448		SRHA
4	210	0.578252		0.023989	2.64448		LHA
4	210	0.734838		0.013646	2.64448		SRHA & LHA
4	210	0.535689		0.00299644	2.64448		SRHA
4	210	0.673417		0.011752	2.64448		LHA
4	270	0.343897	0.700324	-0.00404514	2.64448		SRHA
4	270	0.354441	0.642468	0.00892475	2.64448		LHA
4	270	0.528571	0.637583	-0.00277604	2.64448		SRHA & LHA
4	270	0.33577	0.660352	0.0229832	2.64448		SRHA
4	270	0.564093	1.33059	0.326145	2.64448		LHA
5	0	1.36767	0.0135114	-0.00616776	2.64448		SRHA
5	0	1.53005	0.020655	0.00229195	2.64448		BS-DOM
5	0	1.26328	0.021664	0.00832835	2.64448		SRHA & BS-DOM
5	0	1.19811	0.0209808	-0.00533335	2.64448		SRHA
5	0	1.41663	0.0155625	0.00247377	2.64448		BS-DOM
5	30	1.1355	0.119755	-0.00697671	2.64448		SRHA
5	30	0.917411	0.194533	0.0147082	2.64448		BS-DOM
5	30	0.883319	0.100378	-0.0030768	2.64448		SRHA & BS-DOM
5	30	1.13976	0.108349	-0.00035744	2.64448		SRHA
5	30	1.08947	0.195335	0.0123524	2.64448		BS-DOM
5	90	0.555855	0.297029	0.00136352	2.64448		SRHA
5	90	0.392838	0.32955	0.00976152	2.64448		BS-DOM
5	90	0.709439	0.259222	0.00113756	2.64448		SRHA & BS-DOM
5	90	0.659658	0.290631	0.00823428	2.64448		SRHA
5	90	0.500123	0.341772	-0.00623897	2.64448		BS-DOM
5	150	0.391267	0.416534	0.00374512	2.64448		SRHA
5	150	0.179357	0.416014	0.022939	2.64448		BS-DOM
5	150	0.380846	0.365789	0.00458969	2.64448		SRHA & BS-DOM
5	150	0.425842	0.395588	0.0215454	2.64448		SRHA
5	150	0.215304	0.340259	-0.00169228	2.64448		BS-DOM
5	210	0.210624	0.649502	0.00208999	2.64448		SRHA
5	210	-0.0069542	0.470617	-0.00164005	2.64448		BS-DOM
5	210	0.314531	0.450956	0.00163805	2.64448		SRHA & BS-DOM
5	210	0.191677	0.585386	0.00014923	2.64448		SRHA
5	210	0.0231852	0.448258	-0.00285611	2.64448		BS-DOM
5	270	0.0181781	0.631059	-0.0187429	2.64448		SRHA
5	270	-0.0991451	0.511072	-0.00110981	2.64448		BS-DOM
5	270	-0.0297801	0.495332	-0.00720029	2.64448		SRHA & BS-DOM
5	270	0.0405738	0.639991	0.00405291	2.64448		SRHA
5	270	-0.085367	0.475839	0.00156723	2.64448		BS-DOM
6	0	2.64726	0.0110624	-0.011201
6	0	2.74375	0.0487069	0.00870294
6	0	2.64726	0.0148047	0.0211565
6	0	2.76839	0.0328951	-0.00678516				N2-purged
6	0	2.87177	0.0417492	0.028599				N2-purged
6	0	2.20513	0.0508289	0.0116331				N2-purged
6	30	2.01452	0.534786	0.036087
6	30	2.09288	0.629986	-0.0100903
6	30	1.9901	0.479673	0.00842133
6	30	1.87658	0.560666	0.0221577				N2-purged
6	30	1.52773	0.765274	-0.00964153				N2-purged
6	30	1.75475	0.448744	0.00448483				N2-purged
6	90	1.24212	0.728203	0.00953242
6	90	1.17406	0.799077	-0.00179577
6	90	1.23634	0.730732	0.0225203
6	90	0.815121	0.994232	0.0238772				N2-purged
6	90	0.635872	1.09566	-0.0110718				N2-purged
6	90	1.17219	0.911255	-0.00423174				N2-purged
6	180	0.93048	1.05602	0.0117425
6	180	0.95791	1.03619	0.00183693
6	180	1.03972	1.0472	0.0253669
6	180	0.381632	1.42191	0.0437365				N2-purged
6	180	0.282041	1.26957	0.017658				N2-purged
6	180	0.661563	1.33666	0.0254819				N2-purged
7	0	1.87967	0.0260308	-0.0125503
7	0	2.26354	0.0260994	-0.011936
7	0	2.45429	0.0787953	-0.00171764				N2-purged
7	0	2.35456	0.367411	0.145058				N2-purged
7	0	2.43023	0.0409968	-0.00632051				N2-purged
7	30	1.86075	0.332988	-0.000607156
7	30	2.16327	0.327037	0.0136013
7	30	2.30468	0.134572	0.0271201				N2-purged
7	30	2.30357	0.338399	-0.00196074				N2-purged
7	30	2.29147	0.104295	-0.0151677				N2-purged
7	90	1.42949	0.911852	0.00110536
7	90	1.5425	0.729903	-0.0199661
7	90	2.13261	0.362331	-0.00686964				N2-purged
7	90	1.4997	0.777072	0.00551873				N2-purged
7	90	2.35549	0.336568	-0.00729134				N2-purged
7	150	0.852431	1.2995	-0.0138673
7	150	1.02315	0.924715	-0.0121336
7	150	1.89402	0.450634	0.0162552				N2-purged
7	150	1.11712	0.989602	-0.0166975				N2-purged
7	150	2.06112	0.56781	-0.0249375				N2-purged
7	210	0.57328	1.45088	-0.0134012
7	210	0.845361	1.24797	-0.004824
7	210	1.49708	0.578706	-0.0044173				N2-purged
7	210	0.892228	1.18071	-0.00458133				N2-purged
7	210	1.85613	0.799094	0.0929333				N2-purged
7	270	0.369959	1.6085	0.0289997
7	270	0.618548	1.33086	-0.0181964
7	270	1.55252	0.746138	-0.011083				N2-purged
7	270	0.751602	1.41073	-0.0161842				N2-purged
7	270	1.51012	0.614978	-0.0293581				N2-purged
8	0	2.55068	0.0209338	-0.0134905
8	0	2.5346	0.0242504	-0.0096068
8	0	4.28601	0.034857	-0.00546863				N2-purged
8	0	2.84717	0.0359033	0.00767443				N2-purged
8	0	3.02102	0.0233391	0.0105699				N2-purged
8	30	1.93165	0.161634	-0.00757598
8	30	1.98739	0.17683	-0.0197465
8	30	3.40421	0.2741	0.00217898				N2-purged
8	30	2.05104	0.197576	-0.0068313				N2-purged
8	30	2.36654	0.190259	-0.00454331				N2-purged
8	90	1.33552	0.470677	0.0102309
8	90	1.39613	0.446545	0.00504758
8	90	2.24992	0.749206	0.00185364				N2-purged
8	90	1.28606	0.580855	0.000269806				N2-purged
8	90	1.47614	0.464387	0.000779906				N2-purged
8	150	0.887037	0.692442	-0.0181397
8	150	0.894463	0.556509	-0.0171051
8	150	1.56076	0.994498	0.0100479				N2-purged
8	150	0.71951	0.709399	-0.00226228				N2-purged
8	150	0.924137	0.617242	-0.0120831				N2-purged
8	210	0.559223	0.722798	-0.00817054
8	210	0.605455	0.869883	0.000241881
8	210	1.01331	1.23679	0.00369859				N2-purged
8	210	0.426797	0.966309	-0.0242253				N2-purged
8	210	0.578292	0.871485	0.0195382				N2-purged
8	270	0.244701	0.911548	0.00779849
8	270	0.414718	0.778846	0.00344568
8	270	0.755957	1.31137	-0.000883425				N2-purged
8	270	0.264803	0.969574	0.0169447				N2-purged
8	270	0.297614	1.00508	-0.00734539				N2-purged
9	0	2.88975	0.0324696	-0.0239225
9	0	3.05178	0.0313805	-0.0145548
9	0	2.78582	0.0391239	0.012791
9	0	2.88575	0.0365909	-0.0262084				N2-purged
9	0	2.8939	0.0354666	-4.84965e-05				N2-purged
9	0	3.09807	0.0346487	0.0147671				N2-purged
9	30	2.16814	0.222258	0.00777103
9	30	2.47489	0.285939	-0.0151759
9	30	2.26456	0.211924	-0.0169976
9	30	2.38543	0.380613	0.0142007				N2-purged
9	30	2.14082	0.543749	0.00231141				N2-purged
9	30	2.63178	0.392039	0.00686348				N2-purged
9	90	1.42002	0.634859	-0.0069338
9	90	1.33443	0.714059	-0.0176019
9	90	1.53733	0.485116	0.00999282
9	90	1.46074	1.08927	0.00945746				N2-purged
9	90	1.1795	1.32054	0.0061739				N2-purged
9	90	1.6837	0.989776	-0.00735626				N2-purged
9	180	0.957413	0.981575	0.00957457
9	180	1.03466	0.800616	-0.0194166
9	180	1.01414	1.65134	-0.0293653				N2-purged
9	180	0.715737	1.96445	-0.0174447				N2-purged
9	180	1.16129	1.53103	0.0103775				N2-purged
9	270	0.471448	1.17271	0.00905304
9	270	0.467859	0.853374	-0.0127801
9	270	0.534629	1.98894	0.038609				N2-purged
9	270	0.269008	2.11682	0.00717153				N2-purged
9	270	0.634989	1.83493	0.0071334				N2-purged

## Sheet: Absorbance
	200	205	210	215	220	225	230	235	240	245	250	255	260	265	270	275	280	285	290	295	300	305	310	315	320	325	330	335	340	345	350	355	360	365	370	375	380	385	390	395	400	405	410	415	420	425	430	435	440
Pond	0.952629	0.686213	0.563412	0.483474	0.429849	0.391045	0.353335	0.321699	0.296647	0.277767	0.262411	0.24947	0.237127	0.223922	0.209165	0.193198	0.176951	0.161166	0.145754	0.131067	0.118136	0.106719	0.0964662	0.0875819	0.0794062	0.0721207	0.06556	0.059734	0.0545616	0.049843	0.0455628	0.0416512	0.0380687	0.0347696	0.0317879	0.0289704	0.0263848	0.0241197	0.0219573	0.0200212	0.0183274	0.0167522	0.0152968	0.0139191	0.0126952	0.0115806	0.0106524	0.00993201	0.00927731
SRHA	0.387381	0.381067	0.367768	0.343261	0.323444	0.307972	0.289359	0.271676	0.255275	0.242536	0.232504	0.22499	0.218399	0.210975	0.20227	0.192909	0.183545	0.174603	0.165869	0.157201	0.149061	0.141266	0.133734	0.12686	0.120173	0.113964	0.10797	0.102068	0.0962597	0.0904376	0.084706	0.079187	0.0738189	0.0687647	0.0638726	0.0592516	0.0549795	0.0509722	0.0472615	0.0438792	0.0408372	0.0379746	0.0354173	0.033035	0.0310005	0.0290875	0.0273407	0.0257576	0.0243132
Arctic Ocean	2.53163	2.45735	1.24422	0.450718	0.14685	0.0565498	0.0339933	0.0270289	0.0242944	0.0221604	0.0206531	0.0194645	0.018268	0.0170328	0.0157466	0.0143563	0.0129221	0.0115808	0.0102231	0.008977	0.00787366	0.00688153	0.0060022	0.00532143	0.00474275	0.00421013	0.0037681	0.00334844	0.00301737	0.00269251	0.00239799	0.00212887	0.00188241	0.00167324	0.0014557	0.00126658	0.00109175	0.000931412	0.000798284	0.000690575	0.000591505	0.00046059	0.000341114	0.000183249	4.46775e-05	-3.02975e-05	-6.70138e-05	-5.01313e-05	-9.73841e-05
NaCl 35	NaN	0.807667	0.18919	0.0348991	0.0139846	0.00838122	0.00625564	0.00474507	0.00475013	0.00453049	0.00428931	0.00412881	0.00404851	0.0039069	0.00371619	0.00359463	0.00340496	0.0032709	0.00316252	0.00303865	0.00295495	0.00284466	0.00275681	0.00269237	0.00262568	0.00258083	0.00254928	0.00252094	0.00248963	0.0024652	0.00243633	0.00240842	0.00244277	0.00242127	0.00235594	0.00235088	0.00229468	0.00225308	0.00221846	0.00216731	0.00215735	0.00211705	0.00209942	0.00208283	0.00197486	0.00193745	0.00190358	0.00189383	0.00187124
LHA	0.336119	0.333455	0.328497	0.317121	0.309662	0.303995	0.294008	0.284293	0.275885	0.268889	0.262081	0.255682	0.249003	0.241689	0.233205	0.225259	0.216733	0.208377	0.200247	0.192002	0.184122	0.176424	0.168728	0.161268	0.153795	0.146708	0.139765	0.133195	0.126767	0.120461	0.114442	0.108666	0.102965	0.0977378	0.0926024	0.087703	0.0831268	0.0788476	0.0748132	0.0710794	0.0677464	0.0644356	0.0613907	0.058789	0.0563599	0.0540245	0.0519068	0.0499169	0.0480051
BSW (Värtan)	1.39128	0.770328	0.49734	0.364305	0.303869	0.272801	0.247382	0.226086	0.210235	0.198148	0.187708	0.179192	0.171703	0.163129	0.152432	0.140978	0.129058	0.117455	0.107152	0.0977707	0.089737	0.0816198	0.0730458	0.0668557	0.0618231	0.0572117	0.0530357	0.0490061	0.0451751	0.0416293	0.0391058	0.0371631	0.0347907	0.0323923	0.0309754	0.0296779	0.0277755	0.0263284	0.0248886	0.023535	0.0229211	0.0224887	0.0216096	0.0203251	0.0197747	0.0190225	0.0178204	0.0174598	0.0173362
BS-DOM	0.699057	0.647962	0.599103	0.545772	0.499827	0.45979	0.416091	0.378052	0.346035	0.320629	0.298348	0.277725	0.257425	0.236657	0.215474	0.194614	0.175193	0.157467	0.141039	0.125627	0.112078	0.0999637	0.0890373	0.0796259	0.0712093	0.0639876	0.0576469	0.0520572	0.047048	0.0424529	0.0382787	0.034462	0.0309718	0.0277783	0.0248435	0.0221715	0.0197827	0.0176912	0.0158137	0.0142152	0.0128698	0.0114947	0.010383	0.00943774	0.00863368	0.00791988	0.00725741	0.00663747	0.00610342
[truncated: 75 more columns]
